# Supplementary material
Source: PubMed Central journal article supplement (PMC7272253)
Supplement: NIHMS1571749-supplement-Supplemental_Material.pdf [file NIHMS1571749-supplement-Supplemental_Material.pdf]

## Appendix A

### Detailed Treatment Description

#### Session Tasks

- Session 1: Give equipment (Capnometer and audio player); provide manualized psychoeducation on PTSD hyperarousal and treatment rationale to practice achieving and/or maintaining 40 mmHg PCO<sub>2</sub> and 9 breaths per minute to prevent/reduce hyperventilation during acute distress; provide instruction for devices and on breathing exercises; practice breathing exercise in session; assign homework and give breathing exercise logs to be used at home during the ensuing weeks.
- Session 2: Download the previous week's capnometry data; review homework and troubleshoot as needed; provide manualized psychoeducation on sleep disturbances in PTSD; provide written and verbal sleep instructions and sleep logs.
- Sessions 3-5: Download the previous week's capnometry data; review breathing and sleep homework and troubleshoot as needed.

#### Homework

- Breathing exercises 2x per day (4 hours between exercises at minimum):
  - Listen to 17-minute recording of paced tones set to 9 breaths per minute
  - Match respiration rate and maintain pCO<sub>2</sub> at 40mmHg
  - Write respiration rate and pCO<sub>2</sub> on logs at specific intervals during the exercises
- Sleep monitoring:
  - Complete daily sleep log at bedtime to track sleep and adherence to instructions:

- Go to sleep only when drowsy
- Do not use bed for any activity besides sleep or sexual activity
- Get out of bed if unable to sleep
- Try to avoid daytime naps
- Get at least 30 minutes of sunlight exposure per day
- Minimize use of caffeine, cigarette, and alcohol intake, especially in evenings
- Exercise daily, but not too close to bedtime
- Do not eat too much or too little close to bedtime
- Track time in bed, sleep onset latency, total sleep time, sleep efficiency, sleep quality

## Appendix B

## Detailed Reporting of Missing Data

*Table 1. Cell n's for Demographic and Clinical Characteristics*

|                                          | PTSD Group<br><i>n</i> = 80 | no-PTSD Group<br><i>n</i> = 68 |
|------------------------------------------|-----------------------------|--------------------------------|
| Demographics                             | 80                          | 68                             |
| Relationship Status                      | 79                          | 68                             |
| Veteran Status                           | 80                          | 68                             |
| VA compensation for PTSD                 | 79                          | 68                             |
| Current mental health treatment          | 75                          | 66                             |
| All trauma-related variables             | 80                          | 68                             |
| Baseline PCO <sub>2</sub>                | 78                          | 66                             |
| Baseline respiration rate                | 77                          | 66                             |
| Sleep quality <sup>a</sup>               | 62                          | 59                             |
| PTSD-specific sleep quality <sup>a</sup> | 68                          | 61                             |
| Reported Sleep Apnea                     | 78                          | 67                             |
| Beck Depression Inventory-II             | 75                          | 65                             |
| Beck Anxiety Index                       | 78                          | 67                             |
| Aggression Questionnaire                 | 76                          | 67                             |
| Reported Traumatic Brain Injury          | 77                          | 64                             |
| Other mental health diagnoses            | 80                          | 68                             |

*Note.* PCO<sub>2</sub> = partial pressure of carbon dioxide.

<sup>a</sup>Five no-PTSD and four PTSD participants reporting untreated sleep apnea were excluded from sleep analyses.

*Table 2. Cell n's for Primary Outcome Analyses from Baseline to First Follow-up.*

|                                          | Immediate Treatment |               | Waitlist (Delayed Treatment) |               |
|------------------------------------------|---------------------|---------------|------------------------------|---------------|
|                                          | Time 1              | Time 2        | Time 1                       | Time 2        |
|                                          | <i>n</i> = 47       | <i>n</i> = 23 | <i>n</i> = 33                | <i>n</i> = 27 |
| PCO <sub>2</sub>                         | 45                  | 23            | 33                           | 27            |
| Respiration Rate                         | 44                  | 23            | 33                           | 26            |
| CAPS total                               | 47                  | 23            | 33                           | 27            |
| CAPS hyperarousal                        | 47                  | 23            | 33                           | 27            |
| Beck Depression Inventory                | 44                  | 20            | 31                           | 35            |
| Aggression Questionnaire                 | 44                  | 20            | 32                           | 26            |
| Sleep Quality <sup>a</sup>               | 31                  | 17            | 29                           | 19            |
| PTSD-specific sleep quality <sup>a</sup> | 37                  | 19            | 30                           | 24            |
| Sleep onset latency <sup>a,b</sup>       | 40                  | 19            | 31                           | 25            |
| Total sleep time <sup>a,b</sup>          | 38                  | 19            | 31                           | 24            |

*Note.* PCO<sub>2</sub> = partial pressure of carbon dioxide; CAPS = Clinician-Administered PTSD Scale.

<sup>a</sup>Three Immediate treatment and one Waitlist subject were excluded from sleep analyses due to reported untreated sleep apnea.

<sup>b</sup>Derived from Pittsburgh Sleep Quality Index.

## Appendix C

## Detailed Therapy Process Results

| Measure                                                        | Mean (SD)                     | Scale Range | Interpretation |
|----------------------------------------------------------------|-------------------------------|-------------|----------------|
| Expectancy of Improvement <sup>*</sup>                         | 69.7 (23.9)                   | 0-100       | Good           |
| Treatment credibility <sup>+</sup>                             | 6.44 (1.78)                   | 0-9         | Good           |
| Working Alliance <sup>^</sup>                                  | 3.91 (0.86)                   | 1-5         | Very good      |
| Therapist competence <sup>§</sup>                              | 4.04 (0.78)                   | 1-5         | Very good      |
| Therapist fidelity to specific<br>treatment tasks <sup>¶</sup> | 6.32 (0.58) to<br>6.88 (0.42) | 1-7         | Excellent      |

*Note.* Therapy expectancy measures administered at end of treatment session 1; participants and study therapists completed the alliance measure at end of treatment session 1 and treatment session 5. Trained research assistants and other study therapists rated therapist competence and adherence to protocol for randomly selected cases conducted by therapists unknown to them personally.

<sup>\*</sup>Expectancy of Improvement scale (Borkovec et al., 1987). Participants rate how confident he is that the treatment will “improve [his] condition” from “not at all” to “very”

<sup>+</sup>Credibility scales (Borkovec et al., 1987). Participants rate how logical the treatment seems.

<sup>^</sup>Working Alliance Inventory – Short Form Revised (Hatcher & Gillaspay, 2006), total score.

<sup>§</sup>Therapists were rated on general therapeutic skills, such as “collaboration,” “interpersonal effectiveness” and “pacing/effective use of time.”

<sup>¶</sup>Therapists were rated on how well they helped the participant implement the specific breathing and sleep instructions without deviating from the protocol.
